# Supplementary material for: Neutral and ionic platinum compounds containing a cyclometallated chiral primary amine: synthesis, antitumor activity, DNA interaction and topoisomerase I–cathepsin B inhibition
Source: Royal Society of Chemistry journal article supplement (doi:10.1039/c5dt01713k), 2015-01-01
Supplement: c5dt01713k1.pdf [file c5dt01713k1.pdf]

## **Supporting Information**

### **Neutral and ionic platinum compounds containing a cyclometallated chiral primary amine: Synthesis, antitumor activity, DNA interaction and topoisomerase I - cathepsin B inhibition.**

Joan Albert, Ramon Bosque, Margarita Crespo, Jaume Granell, Concepción López, Raquel Martín, Asensio González, Anusha Jayaraman, Josefina Quirante, Carme Calvis, Josefa Badía, Laura Baldomà, Mercè Font-Bardia, Marta Cascante, and Ramon Messeguer.

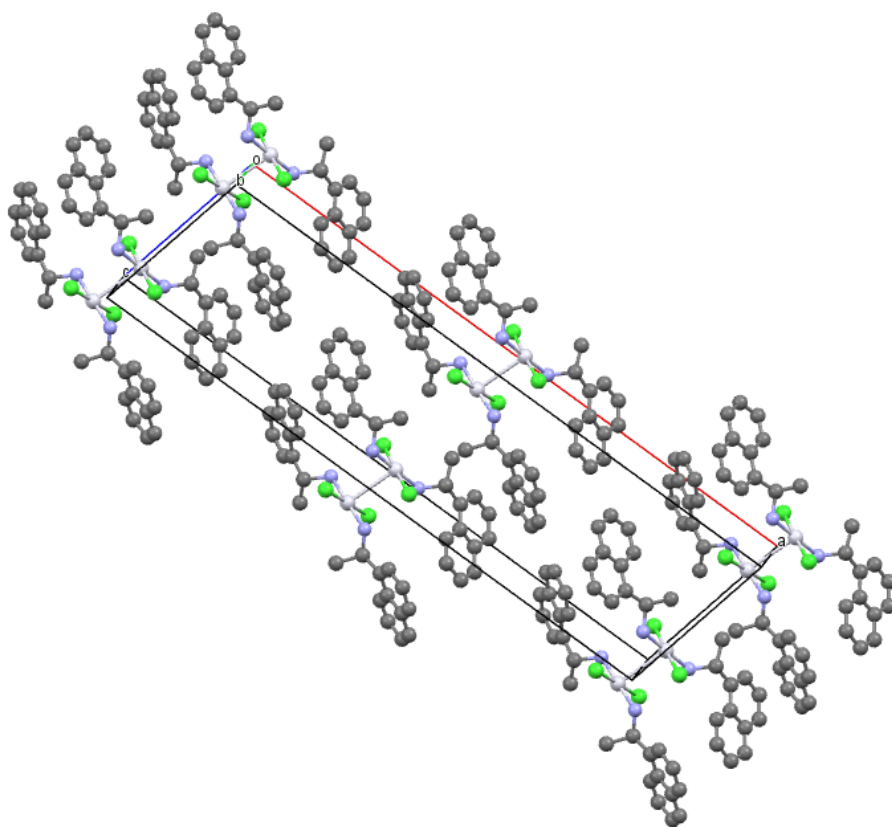

Figure S1 - Unit cell of **7-R**.

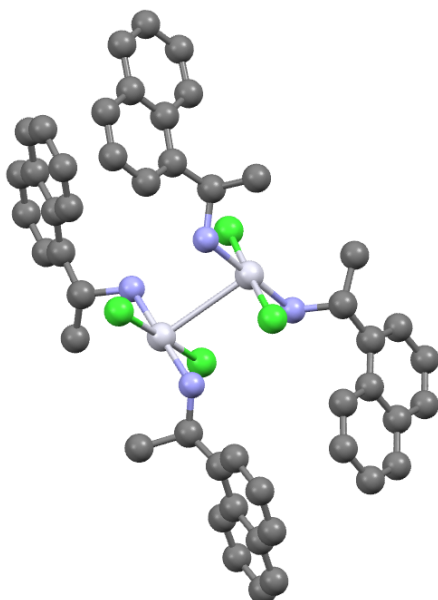

Figure S2 - Dimers formed in the crystal structure of **7-R** through Pt...Pt short contact (3.222 Å).

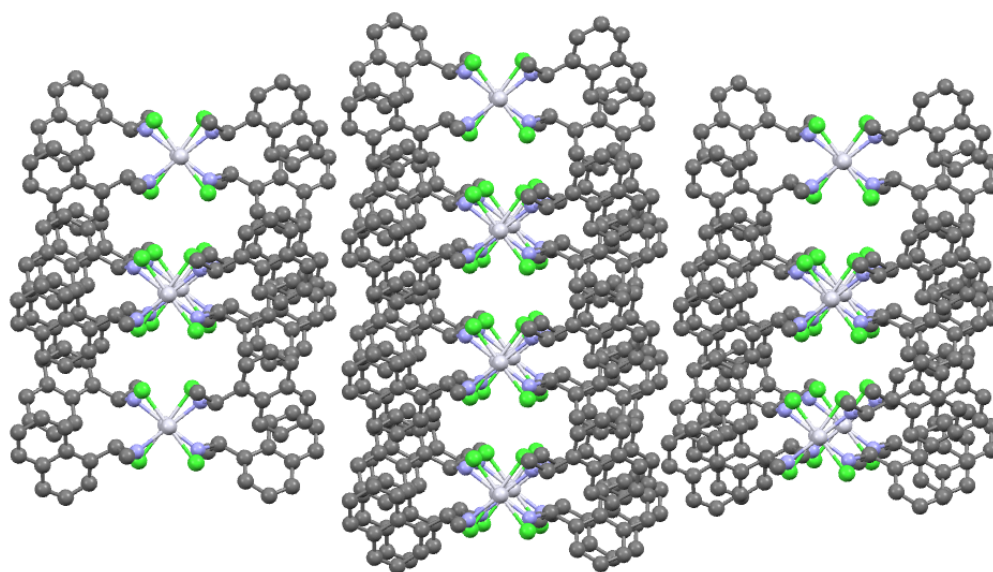

Figure S3 – Packing diagram of **7-R**.
